# Supplementary material for: Propylparaben Promotes Estrogen Receptor-Positive Breast Cancer Risk through PIK3R1: A Comprehensive Integrative Study
Source: Research Square preprint supplement (doi:10.21203/rs.3.rs-7400738/v1), 2025-10-31
Supplement: Supplementary file 1 [file 65b6bd855b4258a90de52be7.docx]

|  |  | **Expression Quantitative Trait Locis of CA4 and PIK3R1** | | | | | | |  |  |
| --- | --- | --- | --- | --- | --- | --- | --- | --- | --- | --- |
| exposure | chr | samplesize | beta | pos | se | SNP | effect allele | other allele | eaf | pval |
| CA4 | 2 | 26953 | 0.112 | 43360065 | 0.014 | rs28498283 | T | A | 0.254 | 1.74E-16 |
| CA4 | 2 | 31569 | 0.060 | 160677375 | 0.013 | rs12052715 | G | C | 0.710 | 4.34E-06 |
| CA4 | 2 | 31569 | 0.075 | 85806068 | 0.012 | rs3731827 | C | T | 0.419 | 5.36E-10 |
| CA4 | 5 | 31569 | 0.126 | 173205318 | 0.014 | rs2594836 | A | G | 0.750 | 3.39E-20 |
| CA4 | 5 | 31569 | -0.061 | 148200011 | 0.012 | rs56330463 | C | T | 0.582 | 4.28E-07 |
| CA4 | 6 | 25735 | 0.515 | 144385777 | 0.026 | rs149110519 | T | C | 0.053 | 1.81E-85 |
| CA4 | 7 | 31355 | -0.147 | 28724374 | 0.013 | rs56388170 | T | G | 0.289 | 1.68E-29 |
| CA4 | 7 | 30077 | 0.216 | 50370254 | 0.017 | rs149007767 | T | C | 0.150 | 8.35E-39 |
| CA4 | 8 | 31569 | -0.103 | 61650831 | 0.016 | rs7846314 | T | A | 0.178 | 3.16E-11 |
| CA4 | 14 | 30165 | 0.096 | 69179971 | 0.022 | rs10138752 | T | C | 0.083 | 8.73E-06 |
| CA4 | 17 | 28801 | 0.079 | 57716153 | 0.016 | rs4433858 | T | C | 0.842 | 1.11E-06 |
| CA4 | 17 | 29315 | -0.435 | 58208752 | 0.028 | rs345165 | T | C | 0.047 | 8.57E-55 |
| CA4 | 17 | 28250 | -0.648 | 58244021 | 0.029 | rs34820870 | G | T | 0.042 | 6.12E-110 |
| PIK3R1 | 5 | 31569 | 0.085 | 66820274 | 0.012 | rs6414806 | T | C | 0.456 | 1.18E-12 |
| PIK3R1 | 5 | 29661 | -0.273 | 67473708 | 0.040 | rs62357310 | T | C | 0.023 | 6.63E-12 |
| PIK3R1 | 5 | 31568 | 0.224 | 67570613 | 0.014 | rs4976156 | G | A | 0.214 | 2.04E-54 |
| PIK3R1 | 6 | 30872 | 0.089 | 31106459 | 0.019 | rs1265097 | A | C | 0.115 | 1.75E-06 |
| PIK3R1 | 12 | 28418 | -0.068 | 111884608 | 0.012 | rs3184504 | C | T | 0.542 | 1.19E-08 |
| PIK3R1 | 19 | 22704 | 0.059 | 16442019 | 0.013 | rs55908509 | A | G | 0.328 | 3.74E-06 |
