# Supplementary material for: Propylparaben Promotes Estrogen Receptor-Positive Breast Cancer Risk through PIK3R1: A Comprehensive Integrative Study
Source: Research Square preprint supplement (doi:10.21203/rs.3.rs-7400738/v1), 2025-10-31
Supplement: Supplementary file 2 [file 8096e41b3279568a524321ca.docx]

| **String Node Degrees** | |
| --- | --- |
| Gene | Degree |
| CASP3 | 39 |
| ESR1 | 39 |
| MMP9 | 32 |
| TLR4 | 31 |
| CXCR4 | 29 |
| CDK1 | 27 |
| SLC2A1 | 27 |
| HDAC4 | 25 |
| NR3C1 | 24 |
| PDGFRA | 24 |
| MAOA | 23 |
| SERPINE1 | 22 |
| CA4 | 20 |
| CA2 | 19 |
| CA9 | 19 |
| MMP1 | 18 |
| PIK3R1 | 18 |
| PTPN11 | 18 |
| CDK5 | 17 |
| RPS6KA3 | 17 |
