# Supplementary material for: Propylparaben Promotes Estrogen Receptor-Positive Breast Cancer Risk through PIK3R1: A Comprehensive Integrative Study
Source: Research Square preprint supplement (doi:10.21203/rs.3.rs-7400738/v1), 2025-10-31
Supplement: Supplementary file 3 [file e792343486ccd02226458059.docx]

| ProTox-3.0 - Prediction of TOXicity of PP | | | |
| --- | --- | --- | --- |
|
| Classification | Target | Prediction | Probability |
| Tox21-Nuclear receptor signalling pathways | Aryl hydrocarbon Receptor (AhR) | Inactive | 0.75 |
| Tox21-Nuclear receptor signalling pathways | Androgen Receptor (AR) | Inactive | 1 |
| Tox21-Nuclear receptor signalling pathways | Androgen Receptor Ligand Binding Domain (AR-LBD) | Inactive | 1 |
| Tox21-Nuclear receptor signalling pathways | Aromatase | Inactive | 0.99 |
| Tox21-Nuclear receptor signalling pathways | Estrogen Receptor Alpha (ER) | Active | 0.99 |
| Tox21-Nuclear receptor signalling pathways | Estrogen Receptor Ligand Binding Domain (ER-LBD) | Active | 1 |
| Tox21-Nuclear receptor signalling pathways | Peroxisome Proliferator Activated Receptor Gamma (PPAR-Gamma) | Inactive | 0.99 |
